# Supplementary material for: Targeting histone deacetylase 1 (HDAC1) in the bone marrow stromal cells revers imatinib resistance by modulating IL-6 in Ph + acute lymphoblastic leukemia
Source: Springer Nature journal article supplement (doi:10.1007/s00277-024-05830-9), 2024-06-07

# Figure2

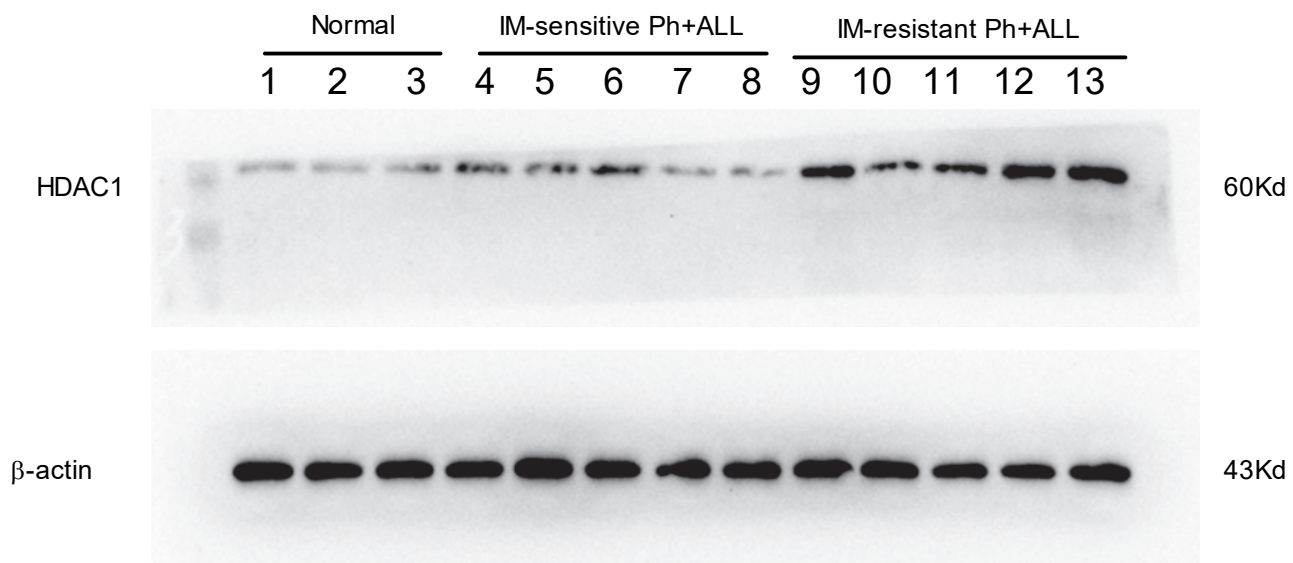

# Figure3

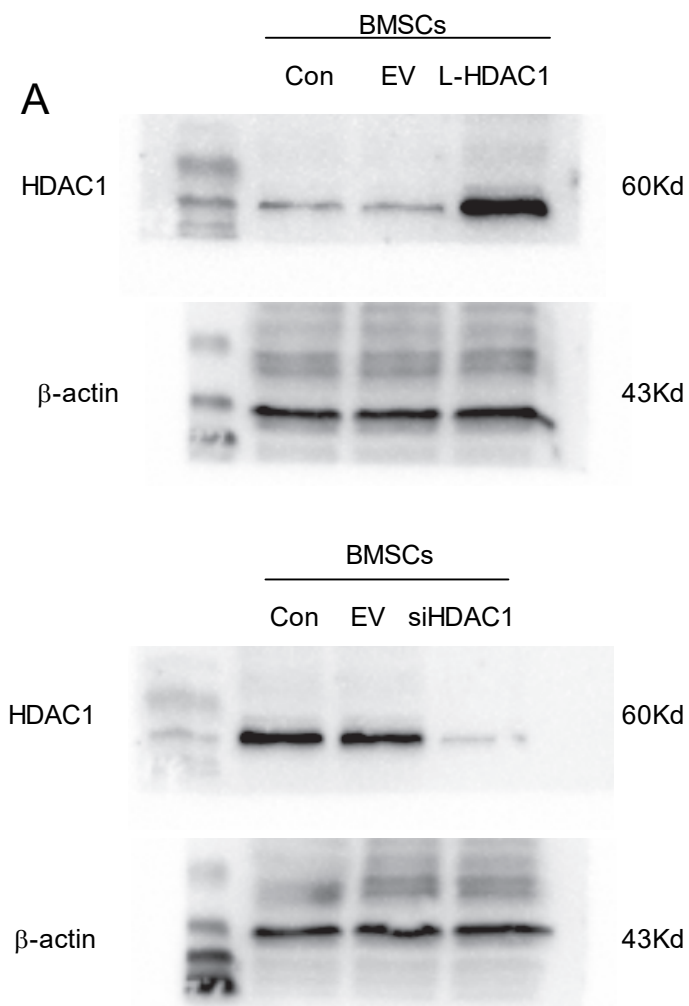

Supplement: 277_2024_5830_MOESM1_ESM.pdf [file 277_2024_5830_MOESM1_ESM.pdf]
