# Supplementary material for: Targeting histone deacetylase 1 (HDAC1) in the bone marrow stromal cells revers imatinib resistance by modulating IL-6 in Ph + acute lymphoblastic leukemia
Source: Springer Nature journal article supplement (doi:10.1007/s00277-024-05830-9), 2024-06-07

Figure5

**C**

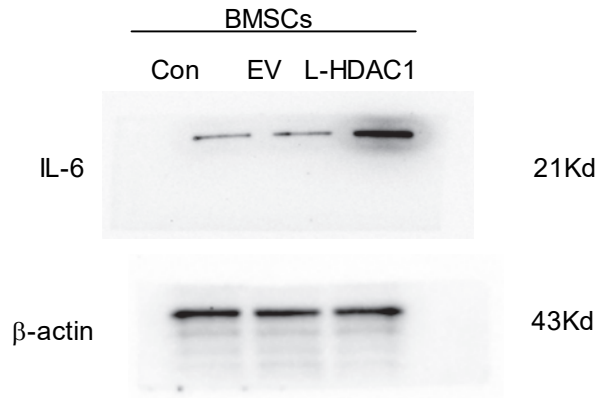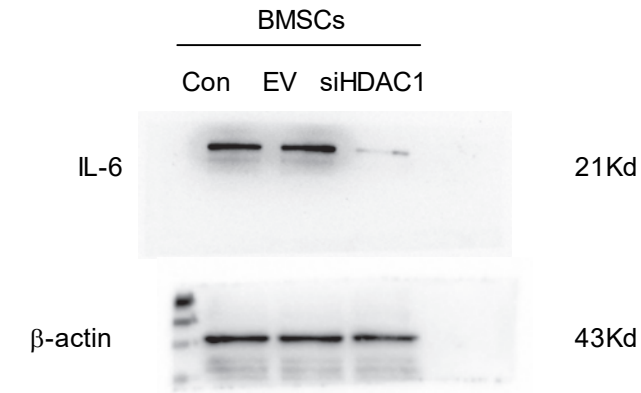

**F**

|               |   |   |   |   |   |
|---------------|---|---|---|---|---|
| IM            | - | + | + | + | + |
| BMSCs         | - | - | + | - | - |
| siHDAC1-BMSCs | - | - | - | + | + |
| IL-6          | - | - | - | - | + |

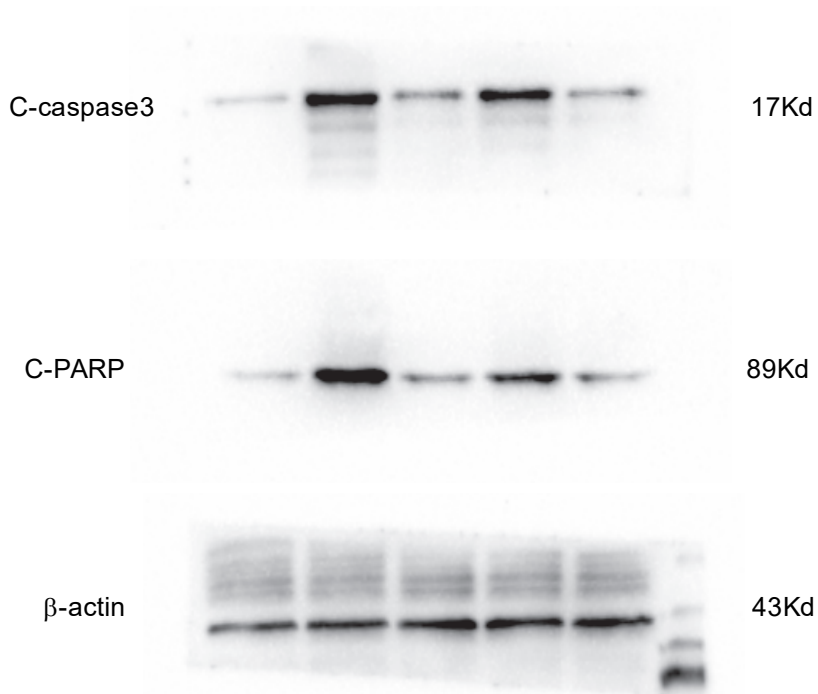

Supplement: 277_2024_5830_MOESM3_ESM.pdf [file 277_2024_5830_MOESM3_ESM.pdf]
